# Supplementary material for: Miscanthus sinensis contributes to the survival of Pinus densiflora seedlings at a mining site via providing a possible functional endophyte and maintaining symbiotic relationship between P. densiflora and endophytes from high soil temperature stress
Source: PubMed Central journal article supplement (PMC10204988; doi:10.1371/journal.pone.0286203), 2023-05-23
Supplement: pone.0286203.s001.pdf [file pone.0286203.s001.pdf]

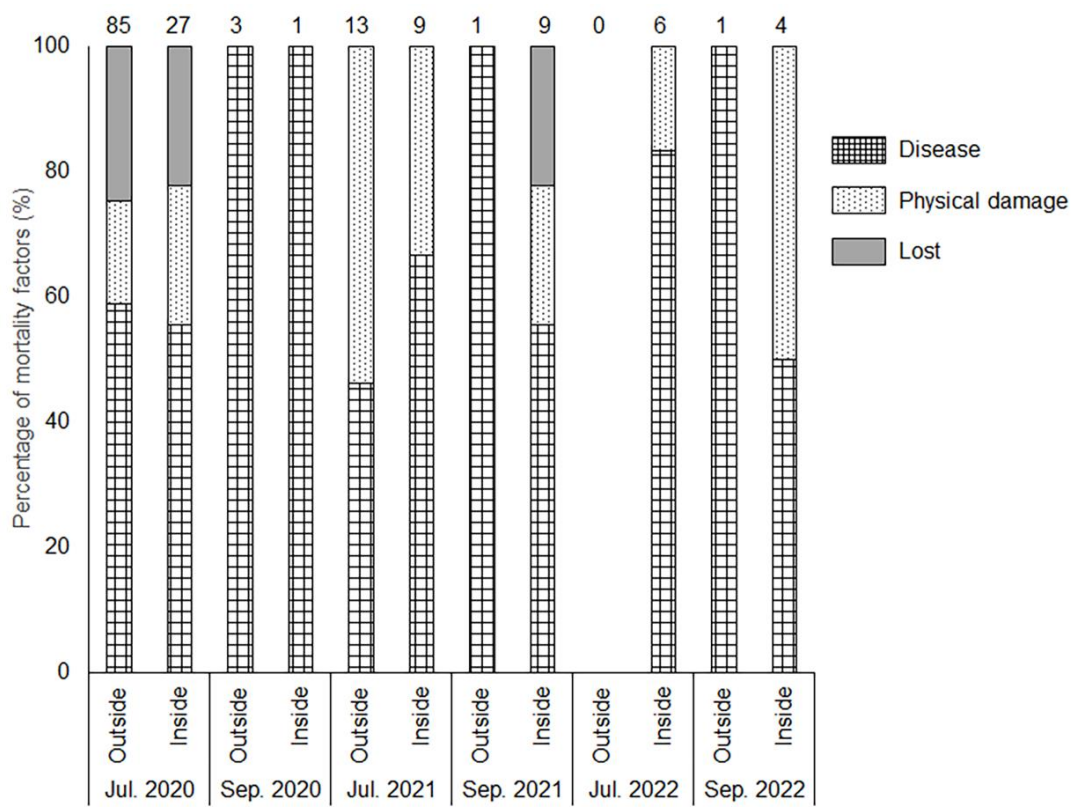

1

2 **S1 Figure. Mortality factors of *Pinus densiflora* seedlings outside and inside patches.**

3 Percentage of mortality factors in *P. densiflora* seedlings collected from July 2020 to

4 September 2022. Numbers above each bar indicate the number of dead seedlings.
