# Supplementary material for: Miscanthus sinensis contributes to the survival of Pinus densiflora seedlings at a mining site via providing a possible functional endophyte and maintaining symbiotic relationship between P. densiflora and endophytes from high soil temperature stress
Source: PubMed Central journal article supplement (PMC10204988; doi:10.1371/journal.pone.0286203), 2023-05-23
Supplement: pone.0286203.s002.pdf [file pone.0286203.s002.pdf]

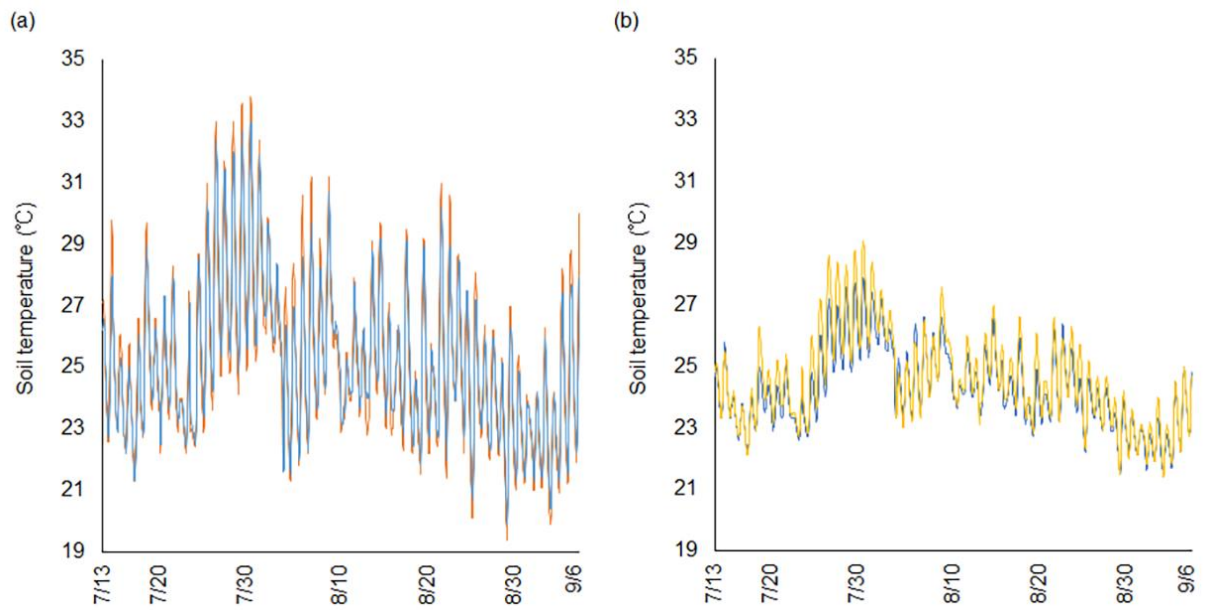

1

2 **S2 Figure. Soil temperature outside and inside the patches from July 2022 to**

3 **September 2022.**

4 (a) Soil temperature outside the patches and (b) soil temperature inside the patches. Soil

5 temperatures were measured at a depth of 5 cm outside and inside the two patches.
