# Supplementary material for: Miscanthus sinensis contributes to the survival of Pinus densiflora seedlings at a mining site via providing a possible functional endophyte and maintaining symbiotic relationship between P. densiflora and endophytes from high soil temperature stress
Source: PubMed Central journal article supplement (PMC10204988; doi:10.1371/journal.pone.0286203), 2023-05-23
Supplement: pone.0286203.s003.pdf [file pone.0286203.s003.pdf]

- 1 **S1 Table. Detection rates of fungi isolated from dead *Pinus densiflora* seedlings with**  
2 **symptoms in July 2020.**

|         | No. of dead seedlings<br>with symptoms | Detection rate of<br><i>C. bicornis</i> (%) | Detection rate of<br>DSEs (%) |
|---------|----------------------------------------|---------------------------------------------|-------------------------------|
| Outside | 50                                     | 12.0                                        | 74.0                          |
| Inside  | 15                                     | 0                                           | 100                           |

- 3 The number of dead *P. densiflora* seedlings collected from outside and inside the patches  
4 in July 2020, showing symptoms and detection rates of fungi isolated from dead *P.*  
5 *densiflora* roots.
