# Supplementary material for: Miscanthus sinensis contributes to the survival of Pinus densiflora seedlings at a mining site via providing a possible functional endophyte and maintaining symbiotic relationship between P. densiflora and endophytes from high soil temperature stress
Source: PubMed Central journal article supplement (PMC10204988; doi:10.1371/journal.pone.0286203), 2023-05-23
Supplement: pone.0286203.s004.pdf [file pone.0286203.s004.pdf]

1 **S2 Table. Comparison of harmful metal concentrations in roots of *Pinus densiflora* seedlings.**

| Element<br>(mg/kg DW) | Jul. 2020       |                  | Sep. 2020       |                 | Jul. 2021        |                  | Sep. 2021        |                  |
|-----------------------|-----------------|------------------|-----------------|-----------------|------------------|------------------|------------------|------------------|
|                       | Outside         | Inside           | Outside         | Inside          | Outside          | Inside           | Outside          | Inside           |
| Al                    | 4486.7 ± 275.5b | 4556.7 ± 743.5b  | 2893.4 ± 210.6b | 2634.7 ± 228.2b | 6085.9 ± 531.7c  | 4798.0 ± 930.1bc | 4565.2 ± 601.5b  | 3826.1 ± 395.9b  |
| Cu                    | 1121.7 ± 82.9a  | 1389.0 ± 218.6ab | 868.4 ± 87.3a   | 959.2 ± 83.1a   | 2718.7 ± 442.7b  | 2228.9 ± 382.3ab | 1645.5 ± 195.8a  | 2014.4 ± 184.9ab |
| Fe                    | 8002.7 ± 580.5c | 9157.4 ± 1764.4c | 5065.4 ± 505.1c | 5752.5 ± 502.8c | 7842.5 ± 963.8c  | 8143.8 ± 1667.5c | 7302.8 ± 1061.3c | 6504.7 ± 1108.4c |
| Mn                    | 99.6 ± 9.4a     | 86.5 ± 10.8a     | 100.6 ± 16.2a   | 70.9 ± 8.8a     | 145.3 ± 12.3a    | 157.5 ± 38.8a    | 121.0 ± 16.3a    | 116.0 ± 19.3a    |
| Zn                    | 1302.9 ± 89.3a  | 1712.4 ± 197.2ab | 900.2 ± 78.5a   | 1175.7 ± 154.5a | 1914.9 ± 244.6ab | 2009.8 ± 317.4ab | 1435.9 ± 180.7a  | 1770.0 ± 161.7ab |

- 2 DW; dry weight. Different letters indicate statistically significant differences among treatments in one-factor ANOVA, Scheffé post-hoc
- 3 test,  $P < 0.05$  ( $n = 5$ ). The concentrations of heavy metals in the roots of each *P. densiflora* seedling were analyzed statistically. Results
- 4 are expressed as mean ± standard error (SE).
